# Supplementary material
Source: PubMed Central journal article supplement (PMC3344972)
Supplement: 1202429109_pnas.201202429SI.pdf [file 1202429109_pnas.201202429SI.pdf]

# Supporting Information

Lee et al. 10.1073/pnas.1202429109

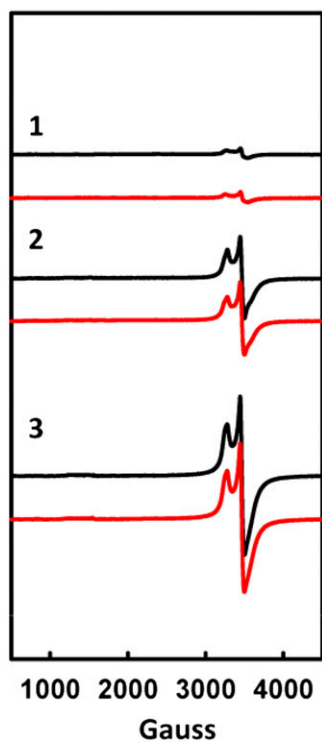

**Fig. S1.** Stability of cofactor-deficient molybdenum-iron (MoFe) proteins upon europium(II) diethylenetriaminepentaacetate [Eu(II)-DTPA] treatment. Perpendicular-mode EPR spectra of  $\Delta nifH$  (1),  $\Delta nifB\Delta nifZ$  (2), and  $\Delta nifB$  (3) MoFe proteins before (black) and after (red) incubation with Eu(II)-DTPA. Samples were prepared by incubating MoFe proteins with Eu(II)-DTPA, followed by the removal of Eu(II)-DTPA and the addition of  $\text{Na}_2\text{S}_2\text{O}_4$  (see *Materials and Methods*).



**Table S1. Substrate-reducing activities of cofactor-deficient MoFe proteins in Eu(II)-DTPA-driven reactions**

| Products                           | Activities                |                                |                           |
|------------------------------------|---------------------------|--------------------------------|---------------------------|
|                                    | <i>ΔnifB</i> MoFe protein | <i>ΔnifBΔnifZ</i> MoFe protein | <i>ΔnifH</i> MoFe protein |
| From H <sup>+</sup>                |                           |                                |                           |
| H <sub>2</sub>                     | 20,017 ± 4,014            | 59,142 ± 6,974                 | 150,626 ± 20,147          |
| From N <sub>2</sub> H <sub>4</sub> |                           |                                |                           |
| NH <sub>3</sub>                    | ND                        | 8,910 ± 967                    | 27,175 ± 2,401            |
| H <sub>2</sub>                     | 9,184 ± 1,011             | 38,732 ± 4,120                 | 87,306 ± 9,307            |
| From N <sub>3</sub> <sup>-</sup>   |                           |                                |                           |
| NH <sub>3</sub>                    | 15,100 ± 2,713            | 31,407 ± 4,944                 | 118,649 ± 17,049          |
| H <sub>2</sub>                     | ND                        | 8,727 ± 994                    | 17,799 ± 2,194            |
| From C <sub>2</sub> H <sub>2</sub> |                           |                                |                           |
| C <sub>2</sub> H <sub>4</sub>      | 9,185 ± 1,004             | 36,019 ± 2,984                 | 110,827 ± 10,090          |
| C <sub>2</sub> H <sub>6</sub>      | ND                        | ND                             | 5,921 ± 713               |
| H <sub>2</sub>                     | 5,152 ± 813               | 14,179 ± 704                   | 40,008 ± 1,490            |
| From C <sub>2</sub> H <sub>4</sub> |                           |                                |                           |
| C <sub>2</sub> H <sub>6</sub>      | ND                        | 5,149 ± 417                    | 17,174 ± 891              |
| H <sub>2</sub>                     | 16,674 ± 2,097            | 39,603 ± 3,319                 | 126,521 ± 9,897           |

Activities are expressed in nanomole product/micromole protein per hour. See *Materials and Methods* for assay conditions. ND, not detectable.
